# Supplementary material for: Electrochemical aptasensor based on DNA-templated copper nanoparticles and RecJf exonuclease-assisted target recycling for lipopolysaccharide detection
Source: Royal Society of Chemistry journal article supplement (doi:10.1039/d3ay01638b), 2023-12-19
Supplement: d3ay01638b1.pdf [file d3ay01638b1.pdf]

## Electronic Supplementary Information

### **Electrochemical aptasensor based on DNA-templated copper nanoparticles and RecJf exonuclease-assisted target recycling for lipopolysaccharide detection**

Shunbi Xie<sup>\*,a</sup>, Shuting Liang<sup>a</sup>, Liangliang Tian<sup>b</sup>, Ge Ding<sup>a</sup>, Meiting He<sup>a</sup>, Haojie Li<sup>a</sup>,  
Heshan Yang<sup>\*,a</sup>

a Chongqing Key Laboratory of Environmental Materials and Remediation Technologies, College of Chemistry & Environmental Engineering (Chongqing University of Arts and Sciences), Chongqing 402160, PR China.

b School of Electronic Information and Electrical Engineering (Chongqing University of Arts and Sciences), Chongqing 402160, PR China.

\* Corresponding authors: Shunbi Xie, Heshan Yang

E-mail addresses: xieshunbi@163.com

F-Tel.: +86-023-61162815

**Table S1** Oligonucleotide sequences used in this assay

| Oligonucleotide | Sequence (5' to 3')                                                                                                                       |
|-----------------|-------------------------------------------------------------------------------------------------------------------------------------------|
| LPS aptamer     | CTT CTG CCC TCC TTC CTA GCC GGA TCG CGC TGG<br>CCA GAT GAT ATA AAG GGT CAG CCC CCC AGG AGA<br>CGA GAT AGG CGG ACA CT                      |
| c DNA           | NH <sub>2</sub> -AGT GTC CGC CTA TCT CGT CTC CTG GGG GGC<br>TGA CCC TTT ATA TCA TCT GGC CAG CGC GAT CCG<br>GCT AGG AAG GAG GCG GGC AGA AG |

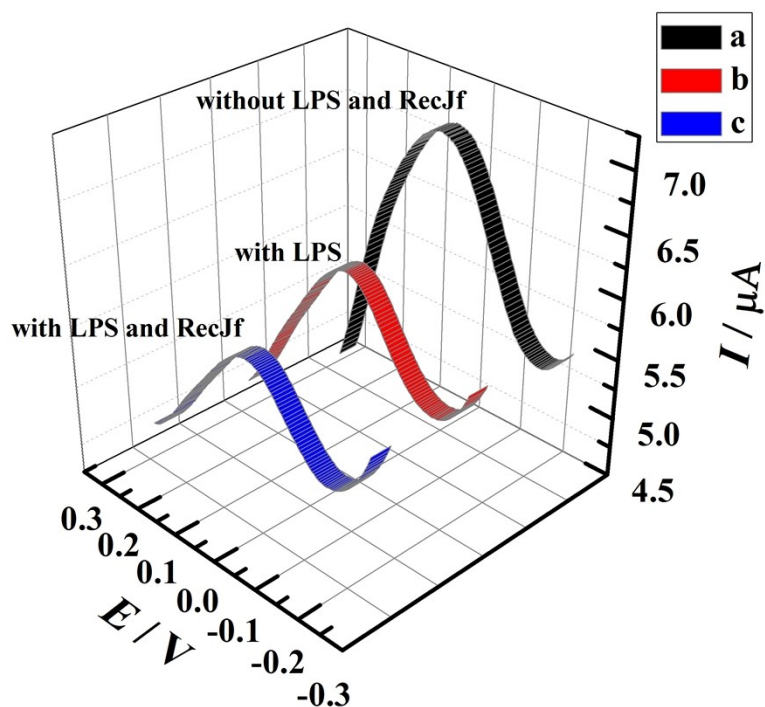

Fig. S1 Comparison of DPV signals for presence or absence of target and RecJf exonuclease. DPV signals for the absence of LPS and RecJf exonuclease (a), DPV signals for the presence of LPS (b), DPV signals for the presence of LPS and RecJf exonuclease (c).

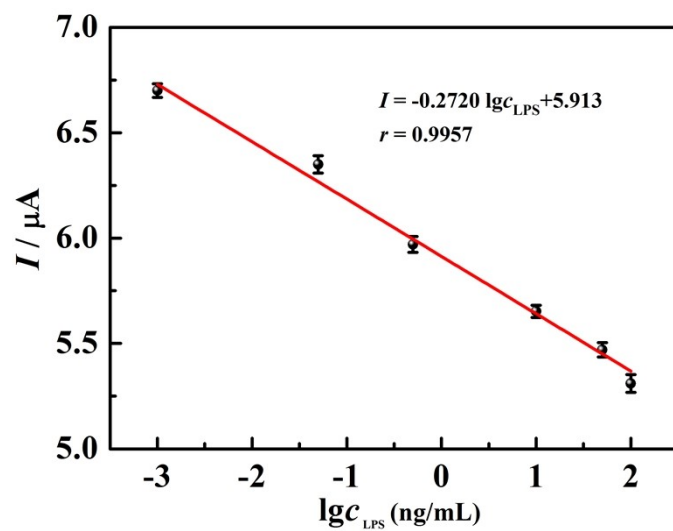

Fig. S2 The calibration plot for current vs. logarithm of the LPS concentration for the absence of RecJf exonuclease.

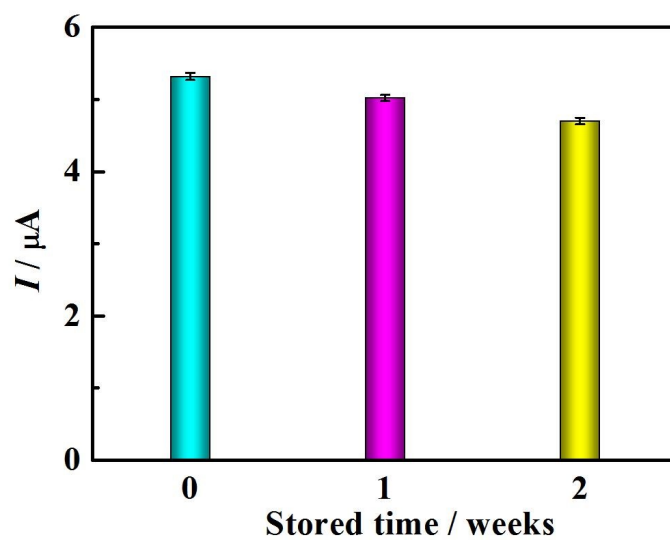

Fig. S3. The stability of biosensor for 0 week, 1 week and 2 weeks, respectively.

**Table S2.** The analytical performance of the proposed method compared with other LPS electrochemical detection method.

| Analytical method | Materials                                                                                                                            | Linear range             | Detection limit | detection time | Ref.      |
|-------------------|--------------------------------------------------------------------------------------------------------------------------------------|--------------------------|-----------------|----------------|-----------|
| DPV               | graphene and gold nanoparticles                                                                                                      | 10 fg/mL~<br>50 ng/mL    | 8.7 fg/mL       | 180 min        | 1         |
| DPV               | (4-(ferrocenylacetamido) phenyl) boronic acid                                                                                        | 1.0 pg/mL~<br>1 ng/mL    | 0.34 pg/mL      | 45 min         | 2         |
| DPV               | copper-based metal-organic framework collaborative amplification of dual enzymes (Exo III and terminal deoxynucleotidyl transferase) | 1.0 pg/mL~<br>1.0 ng/mL  | 0.29 fg/mL      | 65 min         | 3         |
| Chronocoulometry  | Ce-based metal-organic frameworks                                                                                                    | 2.5 pg/mL~<br>1 ng/mL    | 1.0 pg/mL       | 215 min        | 4         |
| DPV               | nafion/polypyrrole/graphene oxide                                                                                                    | 50 fg/mL~<br>10 pg/mL    | 33 fg/mL        | 195 min        | 5         |
| DPV               | copper ion-assisted gold nanoparticle aggregates                                                                                     | 0.01 ng/mL~<br>3.0 ng/mL | 3.5 pg/mL       | 25 h           | 6         |
| DPV               | silver nanoparticles decorated titanium dioxide nanotube/functionalized reduced graphene oxide                                       | 10 fg/mL~<br>100 ng/mL   | 3.3 fg/mL       | 63 min         | 7         |
| CV                | DNA-templated copper nanoparticles                                                                                                   | 17 fg/mL~<br>100 ng/mL   | 5 fg/mL         | 60 min         | 8         |
| DPV               |                                                                                                                                      | 10 fg/mL~<br>100 ng/mL   | 6.8 fg/mL       | 90 min         | This work |

### Reference

- 1 L.J. Bai, Y.Q. Chai, X.Y. Pu and R.Yuan, *Nanoscale*, 2014, **6**, 2902–2908.
- 2 Q. Hu, W. X. Feng, Y.Y. Liang, Z.W. Liang, X.J. Cao, S.Q. Li, Y.L. Luo, J.W. Wan, Y.M. Ma, D.X. Han and L. Niu, *Anal. Chem.*, 2022, **94**, 17733-17738.
- 3 Y. Duan, N. Wang, Z. Huang, H. Dai, L. Xu, S. Sun, H. Ma and M. Lin, *Mater. Sci. Eng. C*, 2020, **108**, 110501.
- 4 Y. Huang, L.Wang, L. Sha, Y. Wang, X. Duan and G. Li, *Anal. Chim. Acta*, 2020, **1126**, 31-37.

- 5 W.J. Shen, Y. Zhuo, Y.Q. Chai, and R.Yuan, *Biosens. Bioelectron.*, 2016, **83**, 287-292.
- 6 H. Jiang, J.Yang, K.Wan, D. Jiang, C. Jin, *ACS Sens.*, 2020, **5**, 1325-1335.
- 7 N Wang, H Dai, L Sai, H. Ma, M. Lin, *Biosens. Bioelectron.*, 2019, *126*, 529-534.
- 8 J.M. Tian, Z. Mu, J. Wang, J. Zhou, Y.H. Yuan and L.J.Bai, *Microchim. Acta*, 2021, **188**, 1-11.
